# Supplementary material for: The Achilles’ heel of batteries with alkali metal electrodes
Source: Royal Society of Chemistry journal article supplement (doi:10.1039/d4se01698j), 2025-01-01
Supplement: d4se01698j1.pdf [file d4se01698j1.pdf]

### Supporting Information for

#### The Achilles Heel of Batteries with Alkali Metal Electrodes

Anna Michalak<sup>a</sup>, M. Anji Reddy<sup>a,\*</sup>

<sup>a</sup> IMPACT Energy Storage Laboratory, Faculty of Science and Engineering, Swansea University, Fabian Way, Swansea SA1 8EN, UK

\*Email: [a.r.munnangi@swansea.ac.uk](mailto:a.r.munnangi@swansea.ac.uk)

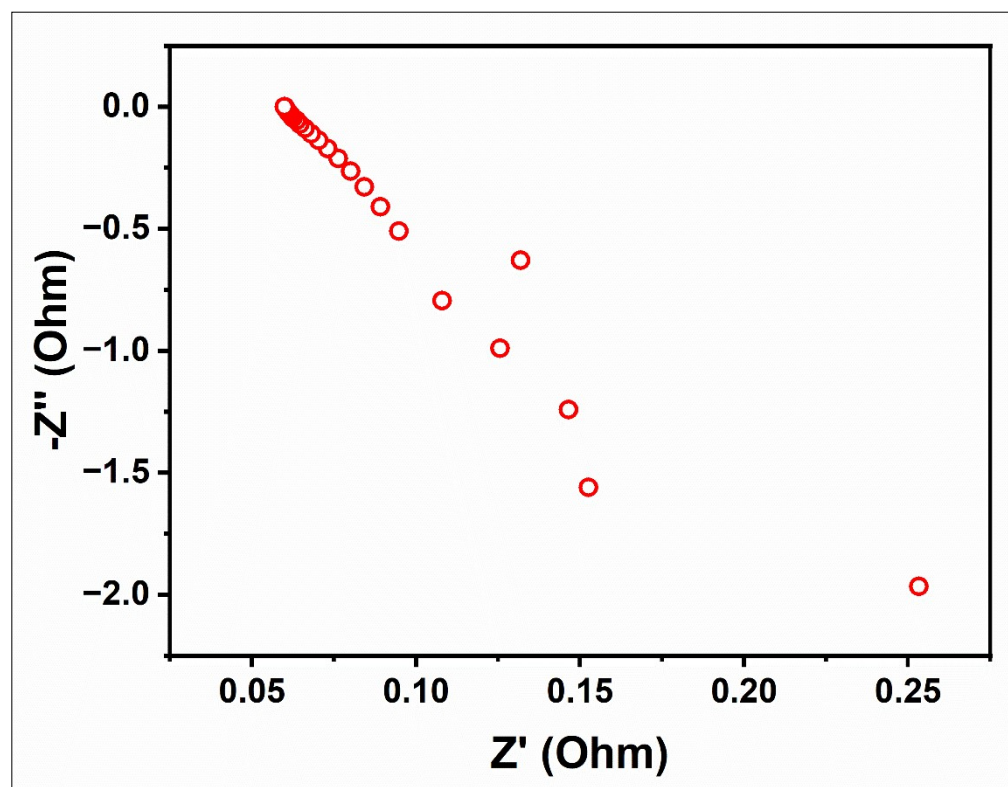

**Figure S1** Impedance spectra of 30 mΩ shunt resistor.

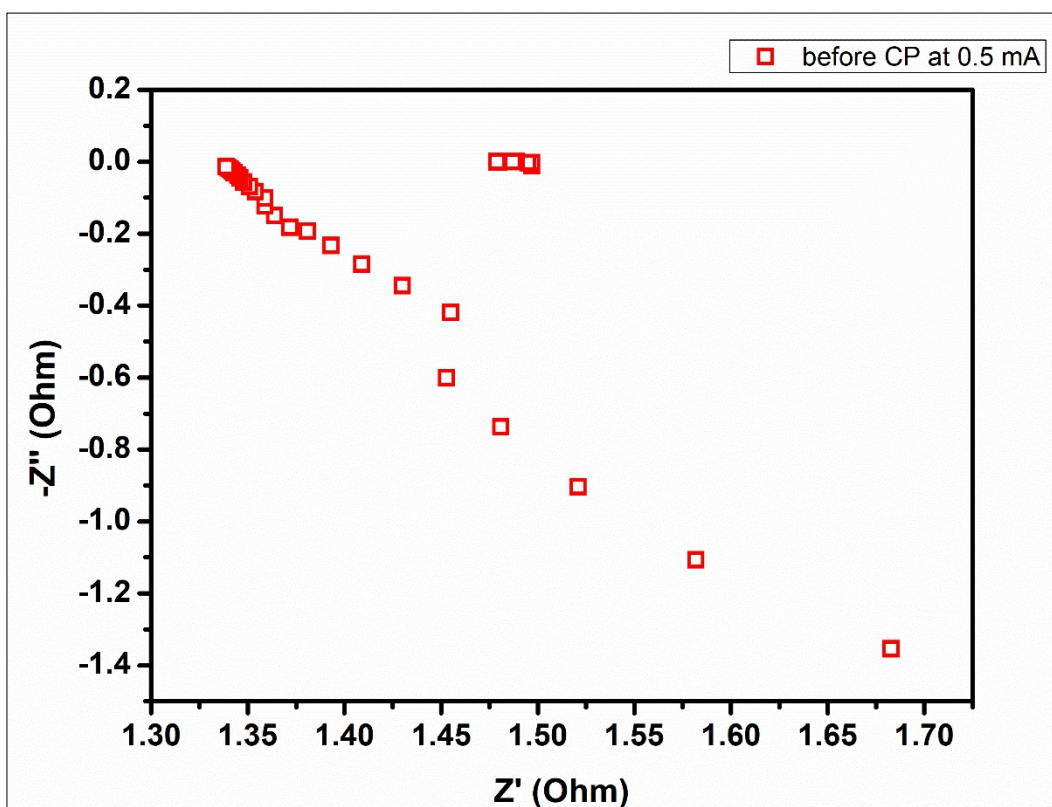

**Figure S2** Impedance spectra of Al-Na/BASE/Na-Al cell values recorded after depositing and stripping Na at 0.4 mA.

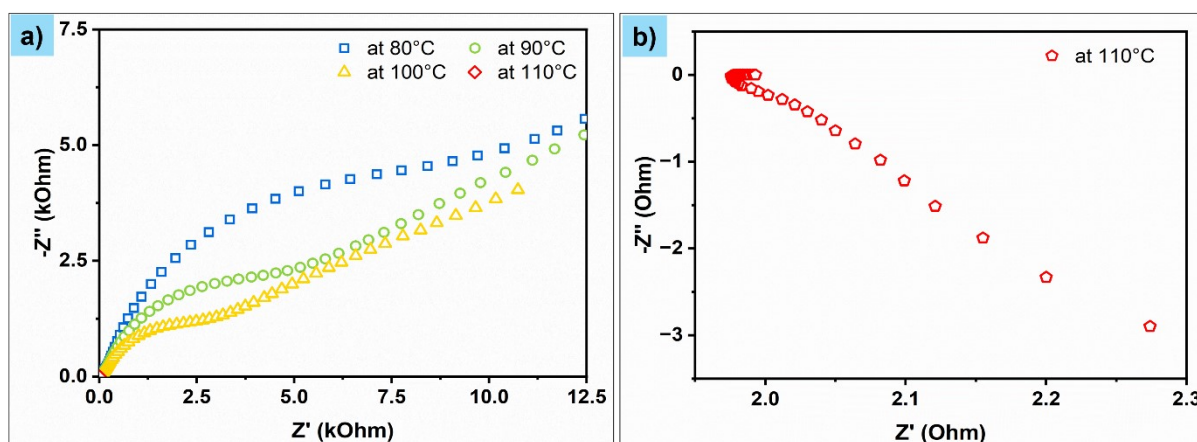

**Figure S3a** Impedance spectra of Al-NMO/BASE/Na-Al cell in the temperature range of 80 °C to 110 °C with increments of +10 °C; b) Impedance spectra of Al-NMO/BASE/Na-Al cell at 110 °C.

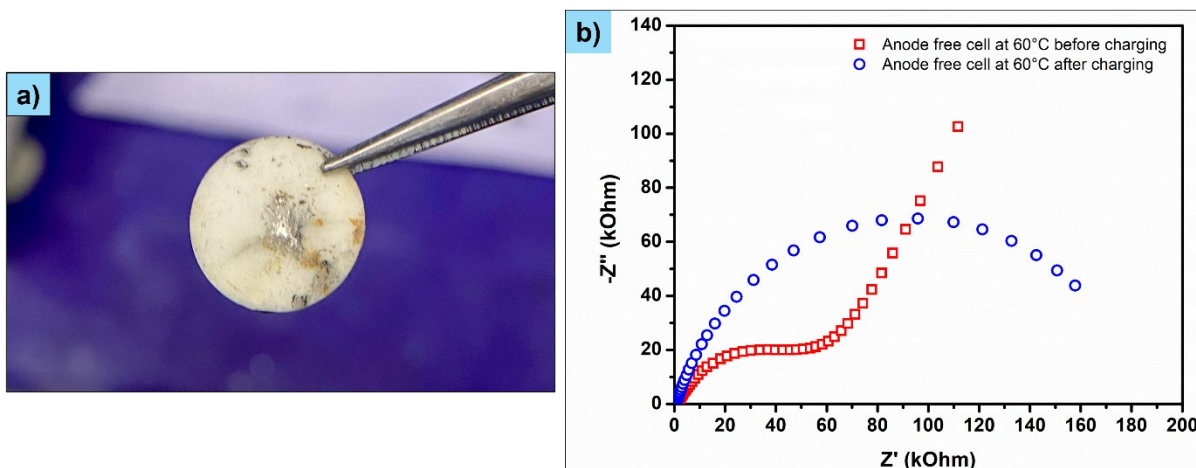

**Figure S4a** digital image of the anode side of the NGS disc from the cell Al-NMO/NGS/Al after the first charge. b) impedance spectra of the same cell before and after charge at 60 °C.



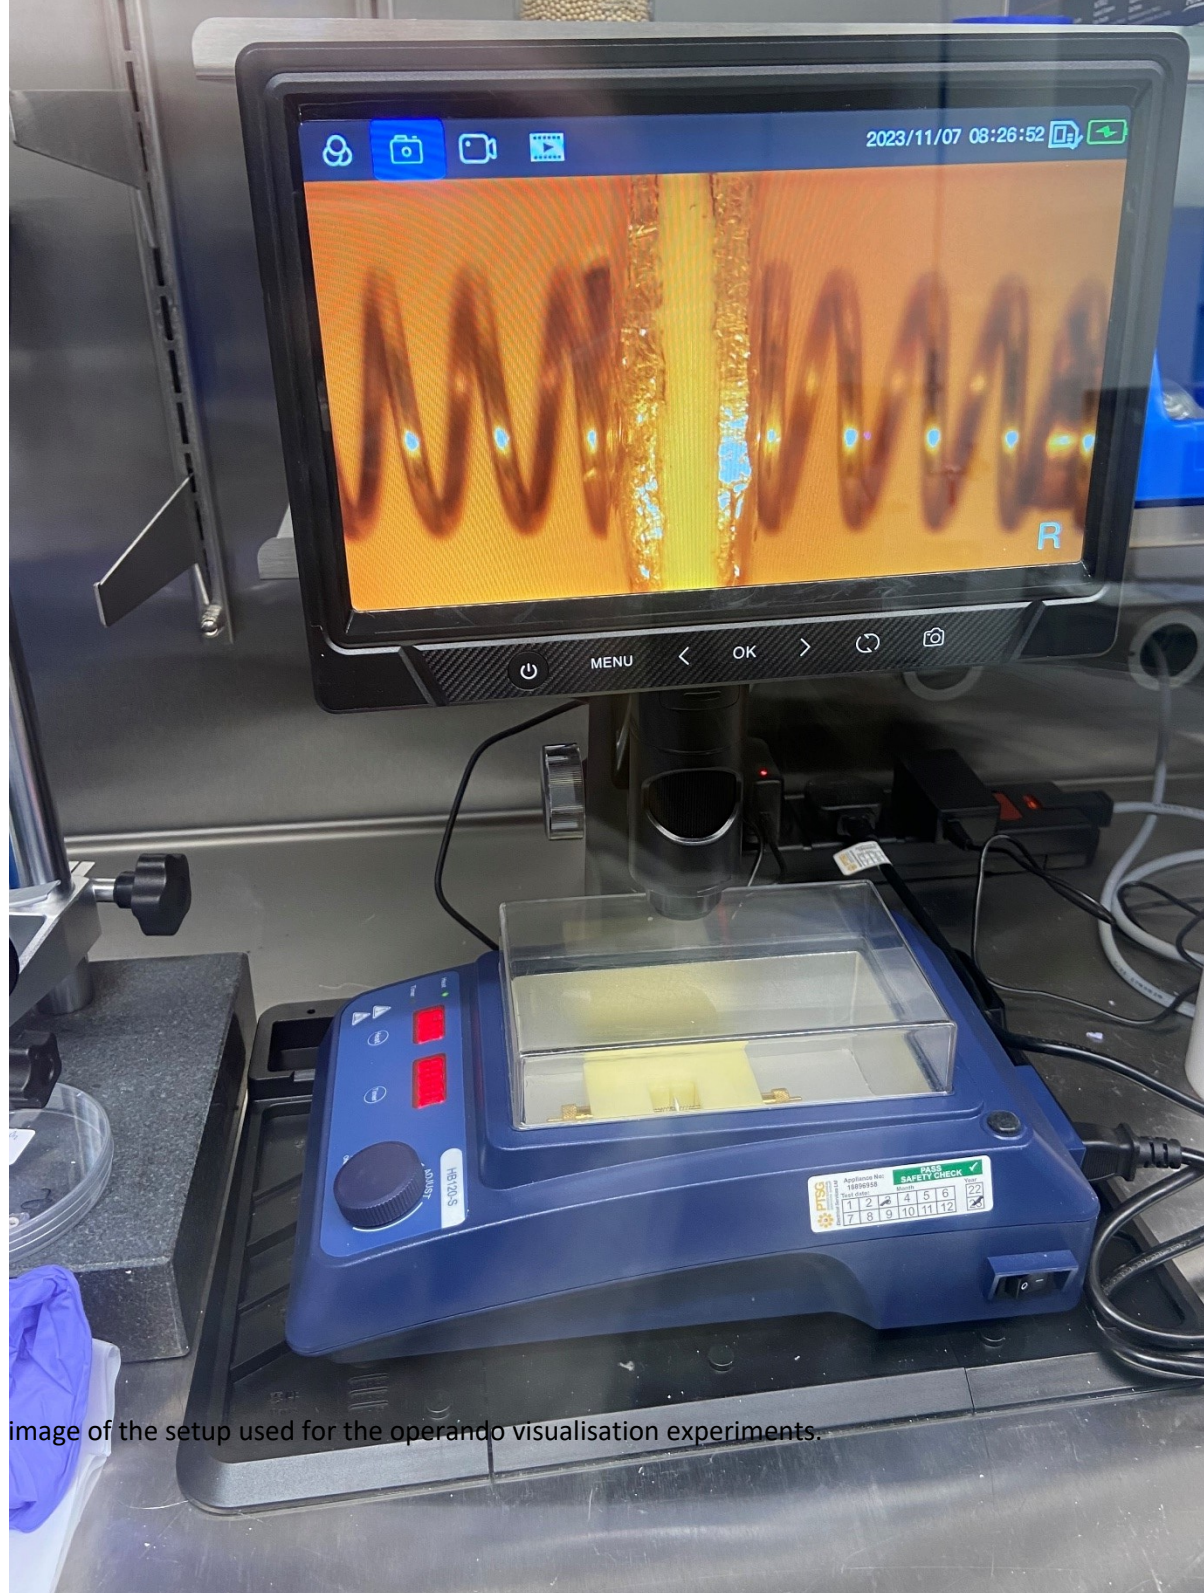

**Figure S5** Digital image of the setup used for the operando visualisation experiments.



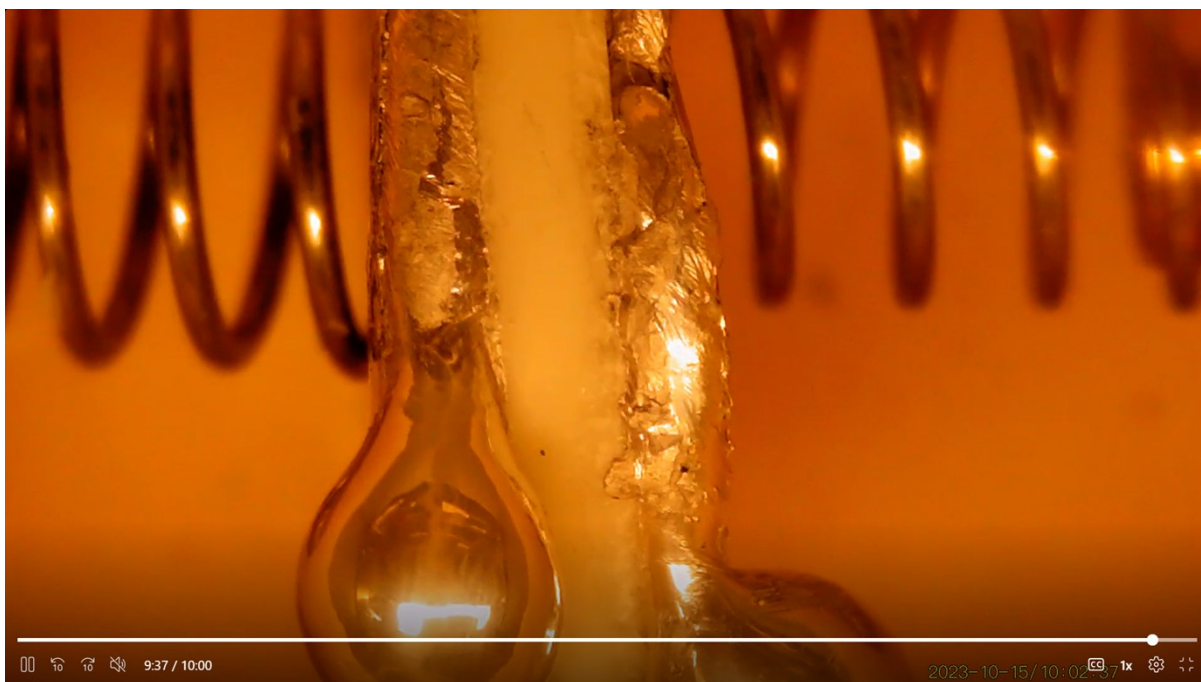

**Figure S6** The video of the cell (Al-Na/NGS/Na-Al) was recorded at 110 °C (changes are evident after the 7<sup>th</sup> minute). [Link to video](#)

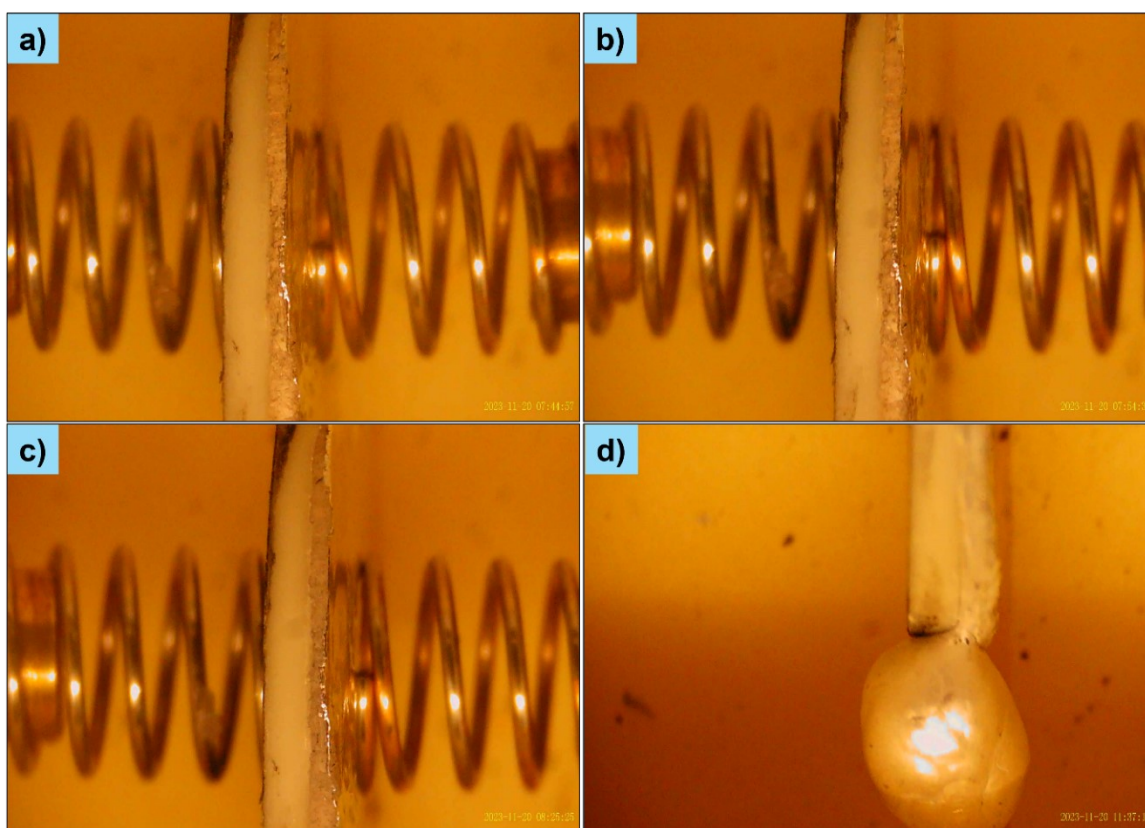

**Figure S7** Optical images of the half cell (Al-NMO/NGS/Na-Al) at various temperatures: a) at 80 °C, b) at 110 °C, and c) at 120 °C. d) digital image of the solid electrolyte taken at RT after cooling down the cell after heating to 120 °C.

#### Temperature Rising Mechanisms in Batteries

The temperature rise in a battery can occur either by heating, overcharging, external or internal short-circuiting, or fast charging. Heating a battery to a specific temperature (generally between 80 °C and 120 °C) triggers a cascade of reactions in batteries. This raises the battery's temperature quickly, leading to a thermal runaway and potential explosion. LIBs are charged beyond the allowed voltage or state of charge (SoC) when overcharging. Overcharging LIBs can lead to the deposition of Li metal on the anode, which can create an internal short circuit. Overcharging can also decompose liquid electrolytes, forming toxic and combustible gases. Oxygen evolution under overcharging conditions is another major issue with certain metal oxide cathodes. The presence of oxygen and flammable gases creates excessive gas pressure inside the cells that can result in venting with flames. Heating and overcharging often lead to TR (Table S3 and S4).

Internal short circuits (ISC) in batteries can occur in many ways. ISC enables direct exothermic chemical reactions, quickly raising the temperature of the battery, triggering chain reactions, and leading to TR and potential explosion. Table S5 summarises some ISC results. Like ISC, external short circuits (ESC) can occur in many ways, even daily (by wrongly connecting the batteries to electronic devices). When the battery is externally short-circuited, current is passed through it heavily. This raises the temperature of the battery due to the resistance of the battery components (Joule heating) (Table S6).

There is a strong intention to charge batteries at a higher rate. We speculate that charging batteries at a higher rate is potentially equal to ESC and should be avoided. For example, the 1C charge rate (60 minutes) of an NMC battery with a 2Ah capacity is 2A. Passing a 60A of current (30C rate; 2 minutes) through this cell can raise the battery's surface temperature to 97 °C (the internal temperature could be higher). This can melt the Na metal anode. Charging the battery at a 2C rate raised its temperature to 50 °C. Fast charging can also enable the deposition of Li and Na metals on the carbon anodes. Beyond melting, this metal deposition could lead to dendrite growth upon repeated cycling and leading to ISC.

#### **Internal short circuits with Lithium and Sodium metals**

The rise of the battery's temperature under ESC conditions is higher when low-resistance wires are used for ESC (Table S5). For example, in a 15 Ah pouch cell, the temperature rises to 113 °C in 18s when 0.562 mΩ short was used. At the same time, it increased to 90 °C (in 50s) and to 68 °C (in 500s) when 0.778 mΩ and 24.0 mΩ were used for ESC. The lower the shorting resistance, the higher the rate of temperature rise. On the other hand, the surface temperature of the battery was raised to 126 °C when the copper nails were used to induce internal short circuits through nail tests. The temperature rose between 100-110 °C when the steel nails were used and mostly unchanged when the plastic nails were used. The battery's surface temperature increased with the nail's electrical conductivity. Considering the high electrical conductivity of alkali metals ( $1.1 \times 10^7$  S/m for Li and  $2.1 \times 10^7$  S/m for Na) and low resistivity  $9.4 \times 10^{-8}$  mΩ for Li and  $4.69 \times 10^{-8}$  mΩ for Na) and their liquid state when melted (enable the high contact with cathode when short-circuited internally), might lead to a disastrous situation when short-circuited.

**Table S1** Impedance values of Cu-Li/LLZO/Li-Cu and Cu-Li/LBASE/Li-Cu cells.

| Temperature (°C) | Cu-Li/LLZO/Li-Cu ( $\Omega$ ) | Cu-Li/LBASE/Li-Cu ( $\Omega$ ) |
|------------------|-------------------------------|--------------------------------|
| 100              | 298                           | 495                            |
| 110              | 192                           | 267                            |
| 120              | 132                           | 153                            |
| 130              | 92                            | 89                             |
| 140              | 67                            | 52                             |
| 150              | 51                            | 30                             |
| 160              | 39                            | 19                             |
| 170              | 31                            | 6                              |
| 180              | 25                            | 4                              |
| 190              | 0.694                         | 2                              |
| 200              | -                             | 0.001                          |

**Table S2** Impedance values of Al-Na/BASE/Na-Al and Al-Na/NGS/Na-Al cells.

| Temperature (°C) | Al-Na/BASE/Na-Al ( $\Omega$ ) | Al-Na/NGS/Na-Al ( $\Omega$ ) |
|------------------|-------------------------------|------------------------------|
| 40               | 76                            | 108                          |
| 50               | 56                            | 75                           |
| 60               | 43                            | 52                           |
| 70               | 33                            | 37                           |
| 80               | 26                            | 28                           |
| 90               | 20                            | 21                           |
| 100              | 0.583                         | 16                           |
| 110              | -                             | 0.787                        |

**Table S3** The effect of external heating on various batteries. LFP - LiFePO<sub>4</sub>; LMO - LiMn<sub>2</sub>O<sub>4</sub>; LCO - LiCoO<sub>2</sub>; NCA - LiNi<sub>0.8</sub>Co<sub>0.15</sub>Al<sub>0.05</sub>O<sub>2</sub>; NMC - LiNi<sub>1/3</sub>Mn<sub>1/3</sub>Co<sub>1/3</sub>O<sub>2</sub>. NA- not available.

| Battery type | Capacity (Ah) | Cathode | TR Initial T in °C | TR Final T in °C                      | Ref          |
|--------------|---------------|---------|--------------------|---------------------------------------|--------------|
| 18650        | 1.1           | LFP     | 220                | (404 ± 23)                            | <sup>1</sup> |
| 18650        | 1.5           | NMC     | 220                | (678 ± 13)                            | <sup>1</sup> |
| 18650        | 2.6           | NMC+LCO | 220                | (853 ± 24)                            | <sup>1</sup> |
| 18650        | 2.6           | LCO     | 198 to 236         | 290 to 511                            | <sup>2</sup> |
| 18650        | 2.95          | NA      | 103.8 to 117.6     | 325.3 to 462.7                        | <sup>3</sup> |
| 18650        | 2.9           | NMC     | 160.09             | 641.41 (surface)<br>1117.8 (internal) | <sup>4</sup> |
| 18650        | 3.1           | NMC     | Induction heating  | 734/741/830                           | <sup>5</sup> |
| Pouch        | 39            | NMC     | Induction heating  | 400/420                               | <sup>5</sup> |
| Prismatic    | 94            | NMC     | Induction heating  | 550                                   | <sup>5</sup> |
| 18650        | 2.6           | NMC     | Heating to 133.9   | 681.9                                 | <sup>6</sup> |
|              | 60            | NMC     | 189.4              | 1149.5                                | <sup>7</sup> |
|              | 150           | NMC     | 191.5              | 988                                   | <sup>7</sup> |
|              | 180           | NMC     | 202.2              | 889.1                                 | <sup>7</sup> |

**Table S4** The effect of overcharging on various batteries. LFP - LiFePO<sub>4</sub>; LMO - LiMn<sub>2</sub>O<sub>4</sub>; LCO - LiCoO<sub>2</sub>; NCA - LiNi<sub>0.8</sub>Co<sub>0.15</sub>Al<sub>0.05</sub>O<sub>2</sub>; NMC - LiNi<sub>1/3</sub>Mn<sub>1/3</sub>Co<sub>1/3</sub>O<sub>2</sub>. NA- not available.

| Battery Type | Capacity (Ah) | Cathode | Overcharging Conditions | Testing T in °C | Max T in °C | TR | Ref          |
|--------------|---------------|---------|-------------------------|-----------------|-------------|----|--------------|
| 18560        | 2.6           | LCO     | 1C, 2C and 3C until     | 35              | 62.6,       | N  | <sup>8</sup> |

|       |     |     |                        |    |                  |   |              |
|-------|-----|-----|------------------------|----|------------------|---|--------------|
|       |     |     | 5V                     |    | 66.4,72.1        |   |              |
| 18560 | 2.6 | LCO | 1C, 2C and 3C until 5V | 50 | 67.4,74.6,77.5   | N | <sup>8</sup> |
| 18560 | 2.6 | LCO | 1C, 2C and 3C until 5V | 60 | 78.9, 83.5, 86.6 | N | <sup>8</sup> |

**Table S5** The internal short circuit (ISC) effect on various batteries. Nail penetration test (NPT); LFP - LiFePO<sub>4</sub>; LMO - LiMn<sub>2</sub>O<sub>4</sub>; LCO - LiCoO<sub>2</sub>; NCA - LiNi<sub>0.8</sub>Co<sub>0.15</sub>Al<sub>0.05</sub>O<sub>2</sub>; NMC - LiNi<sub>1/3</sub>Mn<sub>1/3</sub>Co<sub>1/3</sub>O<sub>2</sub>; NA - not available.

| Battery Type | Capacity (Ah) | Cathode | ISC method                                        | Max T in °C | Ref           |
|--------------|---------------|---------|---------------------------------------------------|-------------|---------------|
| Pouch        | 15            | LMO+NMC | NPT with Cu (10x50) mm at 10 c S <sup>-1</sup>    | 126         | <sup>9</sup>  |
| 18650        | NA            | NA      | Bending and deformation (indenter force - 2.98kN) | 107         | <sup>10</sup> |
| Pouch        | 10            | NMC     | Needle penetration                                |             | <sup>8</sup>  |

**Table S6** The external short circuit (ESC) effect on various batteries. LFP - LiFePO<sub>4</sub>; LMO - LiMn<sub>2</sub>O<sub>4</sub>; LCO - LiCoO<sub>2</sub>; NCA - LiNi<sub>0.8</sub>Co<sub>0.15</sub>Al<sub>0.05</sub>O<sub>2</sub>; NMC - LiNi<sub>1/3</sub>Mn<sub>1/3</sub>Co<sub>1/3</sub>O<sub>2</sub>. NA- not available.

| Battery Type | Capacity (Ah) | Cathode /Chemistry | ESC method  | Max peak Current in A | Max peak T in °C | Ref           |
|--------------|---------------|--------------------|-------------|-----------------------|------------------|---------------|
| 18650        | 2.6           | LCO                | 4.39mΩ      | NA                    | 110              | <sup>5</sup>  |
| 18650        | 2             | NMC                | NA          | Over 60A              | 97               | <sup>11</sup> |
| Coin cell    | 0.075         | LCO/NMC            | 50mΩ        | Over 10C              | 85               | <sup>12</sup> |
| Pouch        | 9.6           | NMC                | 1.1mΩ       | 1415                  | 107              | <sup>13</sup> |
| Pouch        | 9.7           | NCA                | 1.3mΩ       | 1342                  | 121              | <sup>13</sup> |
| Pouch        | 7             | LFP                | Cu cable    | 900                   | 100              | <sup>14</sup> |
| Pouch        | 45            | LFP                | Cu cable    | 1084                  | NA               | <sup>14</sup> |
| Prismatic    | NA            | NCA                | NA          |                       | 120              | <sup>15</sup> |
| Pouch        | NA            | NMC                | 5mΩ         | 1220                  | 90               | <sup>16</sup> |
| Prismatic    | NA            | NMC                | 5mΩ         | 1492                  | 271              | <sup>16</sup> |
| 18650        | 2.45          | NMC                | NA          | Over 75               | 97               | <sup>17</sup> |
| 18650        | 2.75          | NCA                | 4/8/15/30mΩ | 90                    | 123              | <sup>18</sup> |
| Prismatic    | 1.15          | LCO                | 5mΩ         | 40                    | 115              | <sup>19</sup> |
| 18650        | 2             | NMC                | 25mΩ        | 74                    | 120              | <sup>20</sup> |
| 18650        | 1.35          | LFP                | NA          | Over 65               | 110              | <sup>21</sup> |
| Prismatic    | 1.5           | LCO                | 5mΩ         | 36                    | 94/109           | <sup>22</sup> |
| Laminated    | 0.75          | LCO                | <30mΩ       | 25                    | 110              | <sup>23</sup> |
| Prismatic    | 160           | LFP                | NA          | 1075                  | 190              | <sup>24</sup> |
| Prismatic    | 8             | LFP                | NA          | 82                    | 95               | <sup>24</sup> |
| Cylindrical  | 13            | SOCl <sub>2</sub>  | NA          | 51                    | 550              | <sup>24</sup> |
| Pouch        | 15            | LMO-NMC            | 0.562mΩ     | 1850                  | 113              | <sup>9</sup>  |

#### References:

- (1) Golubkov, A. W.; Fuchs, D.; Wagner, J.; Wilsche, H.; Stangl, C.; Fauler, G.; Voitic, G.; Thaler, A.; Hacker, V. Thermal-Runaway Experiments on Consumer Li-Ion Batteries with Metal-Oxide and Olivin-Type Cathodes. *RSC Adv.* **2014**, *4* (7), 3633–3642. <https://doi.org/10.1039/C3RA45748F>.
- (2) Liu, J.; Wang, Z.; Gong, J.; Liu, K.; Wang, H.; Guo, L. Experimental Study of Thermal Runaway Process of 18650 Lithium-Ion Battery. *Materials* **2017**, *10* (3), 230. <https://doi.org/10.3390/ma10030230>.



- (3) Belt, J.; Sorensen, A. Thermal and Electrochemical Analysis of Thermal Runaway Propagation of Samsung Cylindrical Cells in Lithium-Ion Battery Modules. *J. Electrochem. Soc.* **2023**, *170* (1), 010515. <https://doi.org/10.1149/1945-7111/aca939>.
- (4) Jia, L.; Wang, D.; Yin, T.; Li, X.; Li, L.; Dai, Z.; Zheng, L. Experimental Study on Thermal-Induced Runaway in High Nickel Ternary Batteries. *ACS Omega* **2022**, *7* (17), 14562–14570. <https://doi.org/10.1021/acsomega.1c06495>.
- (5) Ji, H.; Chung, Y.-H.; Pan, X.-H.; Hua, M.; Shu, C.-M.; Zhang, L.-J. Study of Lithium-Ion Battery Module's External Short Circuit under Different Temperatures. *J Therm Anal Calorim* **2021**, *144* (3), 1065–1072. <https://doi.org/10.1007/s10973-020-09506-0>.
- (6) Mei, J.; Shi, G.; Liu, H.; Wang, Z. Organic and Inorganic Hybrid Composite Phase Change Material for Inhibiting the Thermal Runaway of Lithium-Ion Batteries. *Batteries* **2023**, *9* (10), 513. <https://doi.org/10.3390/batteries9100513>.
- (7) Peng, G.; Ling, X.; Lin, Y.; Jiang, H.; Ma, M.; Yu, A.; Ouyang, D. Thermal Runaway Features of Large-Format Power Lithium-Ion Cells under Various Thermal Abuse Patterns and Capacities. *RSC Adv.* **2023**, *13* (44), 31036–31046. <https://doi.org/10.1039/D3RA06425E>.
- (8) Hamisi, C. M.; Chombo, P. V.; Laoonual, Y.; Wongwises, S. An Electrothermal Model to Predict Thermal Characteristics of Lithium-Ion Battery under Overcharge Condition. *Energies* **2022**, *15* (6), 2284. <https://doi.org/10.3390/en15062284>.
- (9) Abaza, A.; Ferrari, S.; Wong, H. K.; Lyness, C.; Moore, A.; Weaving, J.; Blanco-Martin, M.; Dashwood, R.; Bhagat, R. Experimental Study of Internal and External Short Circuits of Commercial Automotive Pouch Lithium-Ion Cells. *Journal of Energy Storage* **2018**, *16*, 211–217. <https://doi.org/10.1016/j.est.2018.01.015>.
- (10) Sheikh, M.; Elmarakbi, M.; Rehman, S.; Elmarakbi, A. Internal Short Circuit Analysis of Cylindrical Lithium-Ion Cells Due to Structural Failure. *J. Electrochem. Soc.* **2021**, *168* (3), 030526. <https://doi.org/10.1149/1945-7111/abec54>.
- (11) Chen, Z.; Xiong, R.; Lu, J.; Li, X. Temperature Rise Prediction of Lithium-Ion Battery Suffering External Short Circuit for All-Climate Electric Vehicles Application. *Applied Energy* **2018**, *213*, 375–383. <https://doi.org/10.1016/j.apenergy.2018.01.068>.
- (12) Lee, S.-M.; Kim, J.-Y.; Byeon, J.-W. Failure Analysis of Short-Circuited Lithium-Ion Battery with Nickel-Manganese-Cobalt/Graphite Electrode. *J nanosci nanotechnol* **2018**, *18* (9), 6427–6430. <https://doi.org/10.1166/jnn.2018.15691>.
- (13) Kriston, A.; Pfrang, A.; Döring, H.; Fritsch, B.; Ruiz, V.; Adanouj, I.; Kosmidou, T.; Ungeheuer, J.; Boon-Brett, L. External Short Circuit Performance of Graphite-LiNi<sub>1/3</sub>Co<sub>1/3</sub>Mn<sub>1/3</sub>O<sub>2</sub> and Graphite-LiNi<sub>0.8</sub>Co<sub>0.15</sub>Al<sub>0.05</sub>O<sub>2</sub> Cells at Different External Resistances. *Journal of Power Sources* **2017**, *361*, 170–181. <https://doi.org/10.1016/j.jpowsour.2017.06.056>.
- (14) Larsson, F.; Mellander, B.-E. Abuse by External Heating, Overcharge and Short Circuiting of Commercial Lithium-Ion Battery Cells. *J. Electrochem. Soc.* **2014**, *161* (10), A1611–A1617. <https://doi.org/10.1149/2.0311410jes>.
- (15) Zavalis, T. G.; Behm, M.; Lindbergh, G. Investigation of Short-Circuit Scenarios in a Lithium-Ion Battery Cell. *J. Electrochem. Soc.* **2012**, *159* (6), A848–A859. <https://doi.org/10.1149/2.096206jes>.
- (16) Jung, J.-B.; Lim, M.-G.; Kim, J.-Y.; Han, B.-G.; Kim, B.; Rho, D.-S. Safety Assessment for External Short Circuit of Li-Ion Battery in ESS Application Based on Operation and Environment Factors. *Energies* **2022**, *15* (14), 5052. <https://doi.org/10.3390/en15145052>.
- (17) Yang, R.; Xiong, R.; Shen, W. Experimental Study on External Short Circuit and Overcharge of Lithium-Ion Battery Packs for Electric Vehicles. In *2020 4th International Conference on Green Energy and Applications (ICGEA)*; IEEE: Singapore, Singapore, 2020; pp 1–6. <https://doi.org/10.1109/ICGEA49367.2020.241506>.
- (18) Dong, T.; Wang, Y.; Peng, P.; Jiang, F. Electrical-thermal Behaviors of a Cylindrical Graphite-NCA Li-ion Battery Responding to External Short Circuit Operation. *Int J Energy Res* **2019**, *43* (4), 1444–1459. <https://doi.org/10.1002/er.4412>.

- (19) Zhang, L.; Cheng, X.; Ma, Y.; Guan, T.; Sun, S.; Cui, Y.; Du, C.; Zuo, P.; Gao, Y.; Yin, G. Effect of Short-Time External Short Circuiting on the Capacity Fading Mechanism during Long-Term Cycling of LiCoO<sub>2</sub>/Mesocarbon Microbeads Battery. *Journal of Power Sources* **2016**, *318*, 154–162. <https://doi.org/10.1016/j.jpowsour.2016.03.087>.
- (20) Chen, Z.; Xiong, R.; Tian, J.; Shang, X.; Lu, J. Model-Based Fault Diagnosis Approach on External Short Circuit of Lithium-Ion Battery Used in Electric Vehicles. *Applied Energy* **2016**, *184*, 365–374. <https://doi.org/10.1016/j.apenergy.2016.10.026>.
- (21) Xia, B.; Chen, Z.; Mi, C.; Robert, B. External Short Circuit Fault Diagnosis for Lithium-Ion Batteries. In *2014 IEEE Transportation Electrification Conference and Expo (ITEC)*; IEEE: Dearborn, MI, 2014; pp 1–7. <https://doi.org/10.1109/ITEC.2014.6861806>.
- (22) Leising, R. A.; Palazzo, M. J.; Takeuchi, E. S.; Takeuchi, K. J. Abuse Testing of Lithium-Ion Batteries: Characterization of the Overcharge Reaction of LiCoO<sub>2</sub>/Graphite Cells. *J. Electrochem. Soc.* **2001**, *148* (8), A838. <https://doi.org/10.1149/1.1379740>.
- (23) Wu, M.-S.; Chiang, P.-C. J.; Lin, J.-C.; Jan, Y.-S. Correlation between Electrochemical Characteristics and Thermal Stability of Advanced Lithium-Ion Batteries in Abuse Tests—Short-Circuit Tests. *Electrochimica Acta* **2004**, *49* (11), 1803–1812. <https://doi.org/10.1016/j.electacta.2003.12.012>.
- (24) Łebkowski, A. Temperature, Overcharge and Short-Circuit Studies of Batteries Used in Electric Vehicles. *ELECTROTECHNICAL REVIEW* **2017**, *1* (5), 69–75. <https://doi.org/10.15199/48.2017.05.13>.
